# Supplementary material for: Spectral Analysis Approach for Assessing Accuracy of a Low-Cost Air Quality Sensor Network Data
Source: Copernicus journal article supplement (doi:10.5194/amt-2023-62), 2023-04-25
Supplement: Supplementary file 1 [file amt-2023-62-supplement.pdf]

## Performance metric equations

$$RMSE = \sqrt{\frac{1}{N} \sum_{i=1}^N (x_i - R_i)^2} \quad (1)$$

$$MAE = \frac{1}{N} \sum_{i=1}^N |x_i - R_i| \quad (2)$$

Where,

- 5 RMSE = root mean square error  $\mu g/m^3$   
 MAE= mean absolute error  $\mu g/m^3$   
 N = number of 1-hour periods during which all identical instruments are operating and returning valid averages over the duration  
 $x_i$  = valid 1-hour averaged PA sensor PM2.5 concentration for hour i  $\mu g/m^3$   
 10  $R_i$  = valid 1-hour averaged EPA PM2.5 concentration for hour i  $\mu g/m^3$

**Table S1.** Locations of sampling sites of PM<sub>2.5</sub>

| ID | Location                             | Name      | Latitude | Longitude |
|----|--------------------------------------|-----------|----------|-----------|
| E1 | 4500 W. 123rd St.                    | 170310001 | 41.67099 | -87.73246 |
| E2 | 7801 Lawndale                        | 170310076 | 41.75140 | -87.71349 |
| E3 | Kingery Expressway & Torrence Avenue | 170310119 | 41.57862 | -87.55741 |
| E4 | 9511 W. Harrison St                  | 170314007 | 42.06029 | -87.86322 |
| E5 | 13th St. & 50th Ave.                 | 170316005 | 41.86443 | -87.74890 |
| P1 | The Heart Of Riverside               | 10416     | 41.83212 | -87.81295 |
| P2 | Sasa_Pa2_Sl_W                        | 8476      | 41.86120 | -87.62989 |
| P3 | Sheffield Neighbors                  | 12981     | 41.91974 | -87.65742 |
| P4 | Ukrainian Village                    | 3499      | 41.89270 | -87.68569 |
| P5 | Wheaton Highlands                    | 36395     | 41.86352 | -88.08800 |
| P6 | West Lawn                            | 39173     | 41.76776 | -87.73013 |
| P7 | West Rogers Park                     | 4395      | 41.99600 | -87.69200 |
| P8 | Mulford Manor                        | 4404      | 42.02362 | -87.76341 |
| P9 | 1138 Plymouth                        | 5588      | 41.86889 | -87.62944 |

**Table S2.** Descriptive Statistics of PM<sub>2.5</sub> measurements from EPA and PA sampling locations

| ID     | E1   | E2   | E3   | E4  | E5   | P1   | P2   | P3   | P4   | P5   | P6   | P7   | P8   | P9   |
|--------|------|------|------|-----|------|------|------|------|------|------|------|------|------|------|
| Q1     | 5.3  | 5.1  | 6.3  | 4.5 | 4.5  | 4.5  | 5.8  | 4.8  | 4.2  | 5.5  | 5.6  | 3.9  | 4.4  | 4.5  |
| Median | 7.9  | 8.3  | 9.9  | 8.5 | 7.7  | 9.8  | 11.6 | 10.7 | 8.8  | 11.1 | 11.1 | 8.5  | 9.7  | 9.6  |
| Mean   | 8.8  | 9.1  | 11.0 | 9.7 | 8.8  | 12.6 | 14.3 | 13.5 | 12.0 | 14.1 | 14.6 | 11.0 | 12.2 | 12.4 |
| Q3     | 11.2 | 12.2 | 14.6 | 3.4 | 11.8 | 17.8 | 20.6 | 19.3 | 16.9 | 20.1 | 21.1 | 15.6 | 17.3 | 17.5 |

**Table S3.** Local correction model performance

| Location | Model            | $R^2$ | RMSE | MAE | Time   |
|----------|------------------|-------|------|-----|--------|
| US       | St correction    | 0.84  | 2.5  | 1.7 | daily  |
| Chicago  | Local correction | 0.86  | 1.5  | 0.3 | daily  |
| Chicago  | Local correction | 0.73  | 2.6  | 1.9 | hourly |
